# Supplementary material for: Is Green Exercise for All? A Descriptive Study of Green Exercise Habits and Promoting Factors in Adult Norwegians
Source: Int J Environ Res Public Health. 2016 Nov 23;13(11):1165. doi: 10.3390/ijerph13111165 (PMC5129375; doi:10.3390/ijerph13111165)
Supplement: Supplementary file 1 [file ijerph-13-01165-s001.pdf]

# Supplementary Materials: Is Green Exercise for All? A Descriptive Study of Green Exercise Habits and Promoting Factors in Adult Norwegians

Giovanna Calogiuri, Grete G Patil and Geir Aamodt

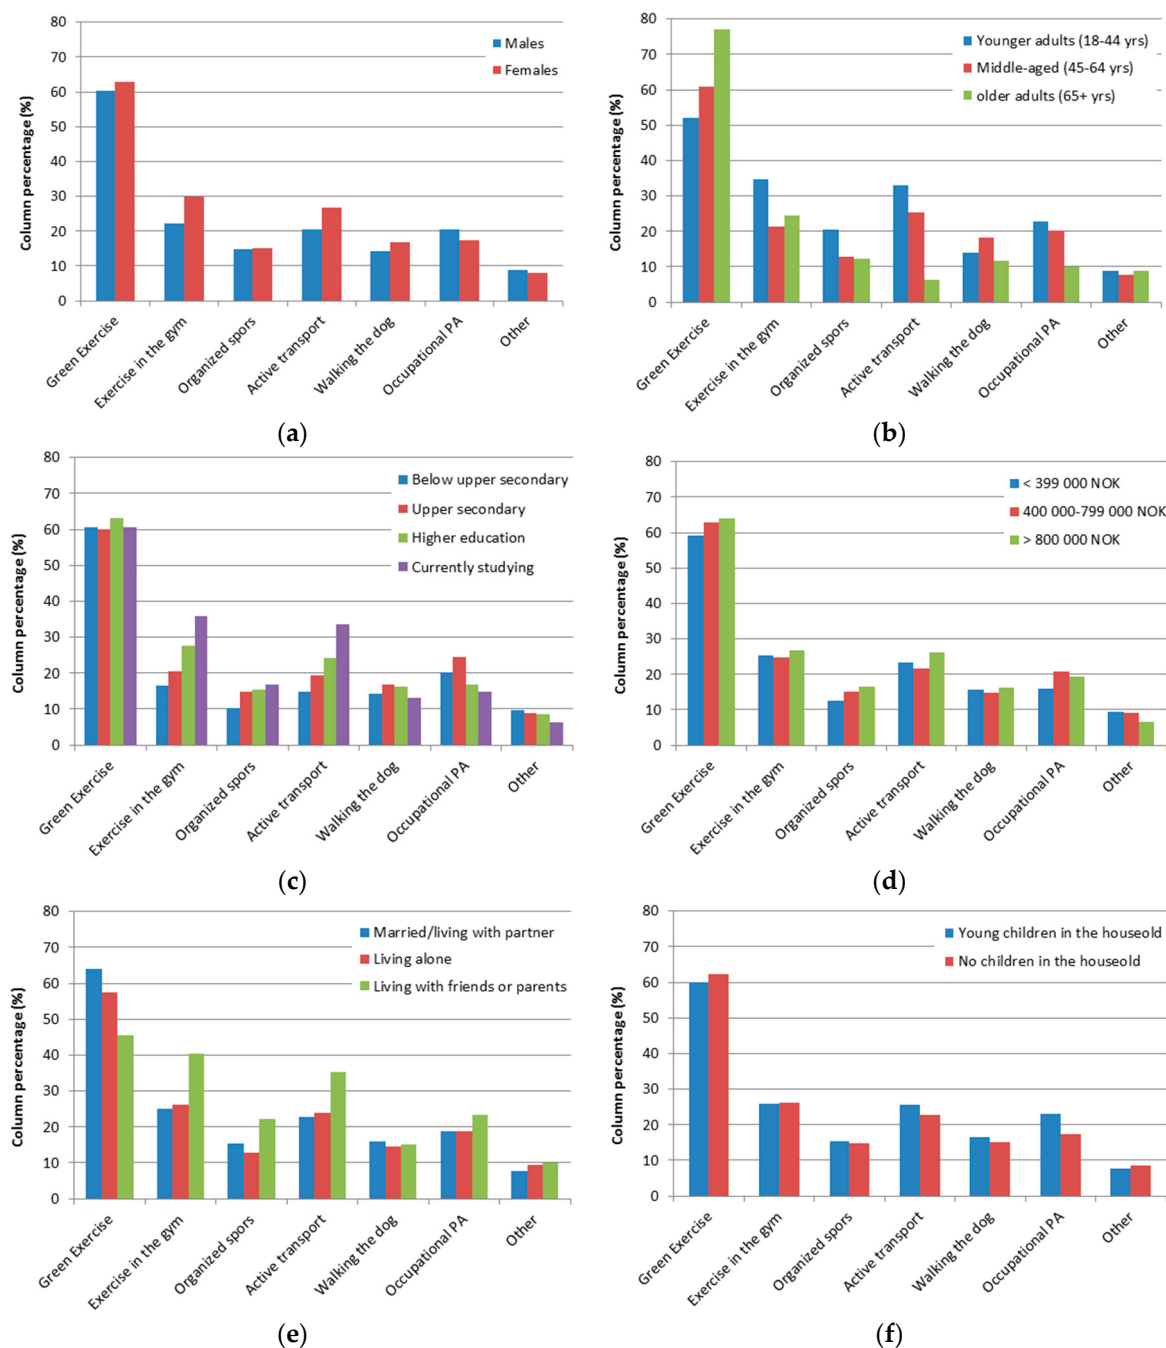

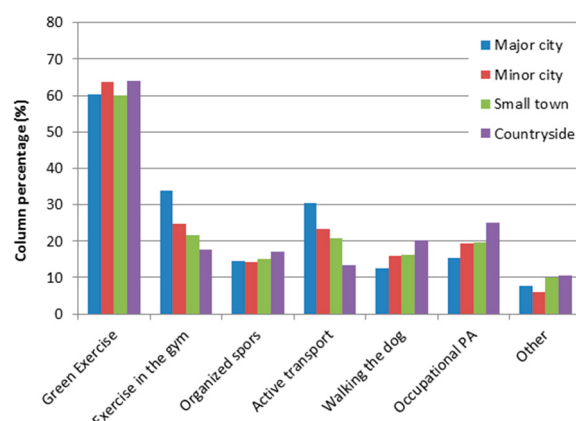

(g)

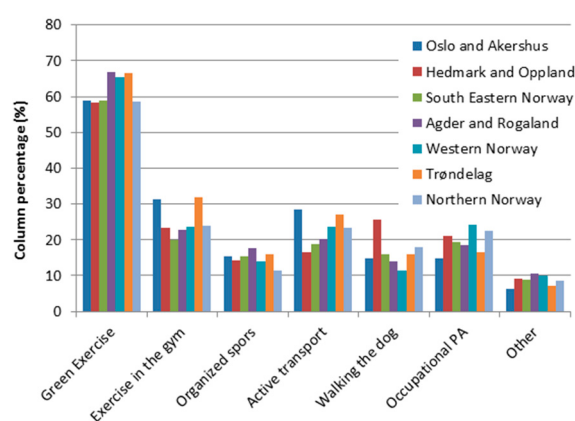

(h)

**Figure S1.** Prevalence of adult Norwegians engaging in weekly green exercise and other forms of physical activity by (*n* = 2168): (a) sex; (b) age group; (c) education level; (d) household income; (e) living situation; (f) having/not having young children in the household; (g) centrality; (h) region. The bars represent the prevalence of individual who reported to engage in green exercise or other forms of PA for  $\geq 1$  min/week, whereas those who reported not to engage at ( $=0$  min/week) are not reported because it would be redundant.

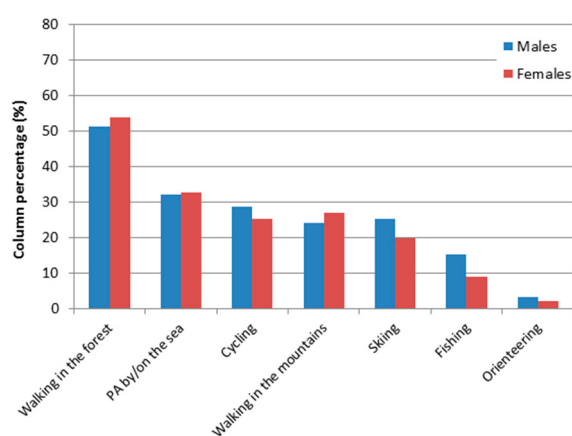

(a)

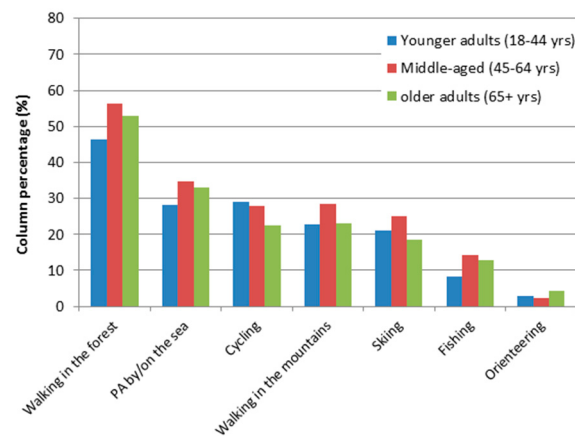

(b)

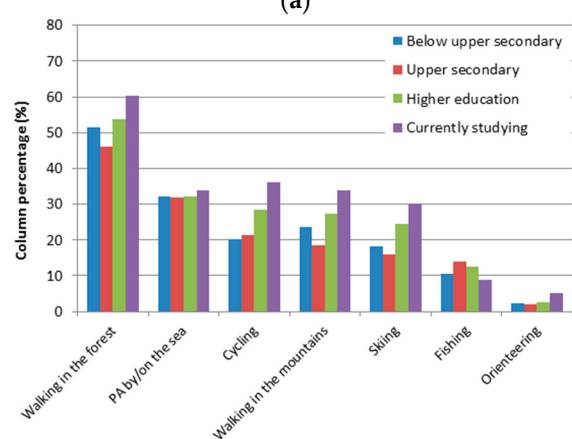

(c)

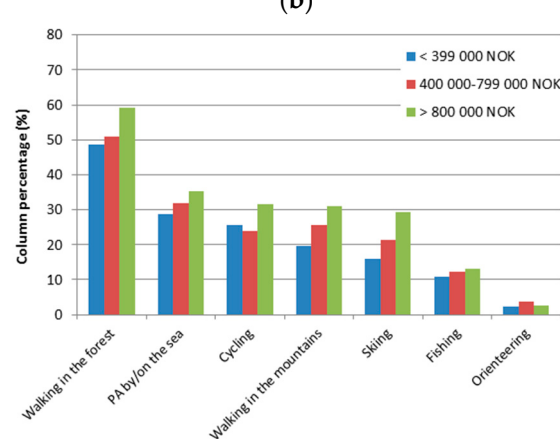

(d)

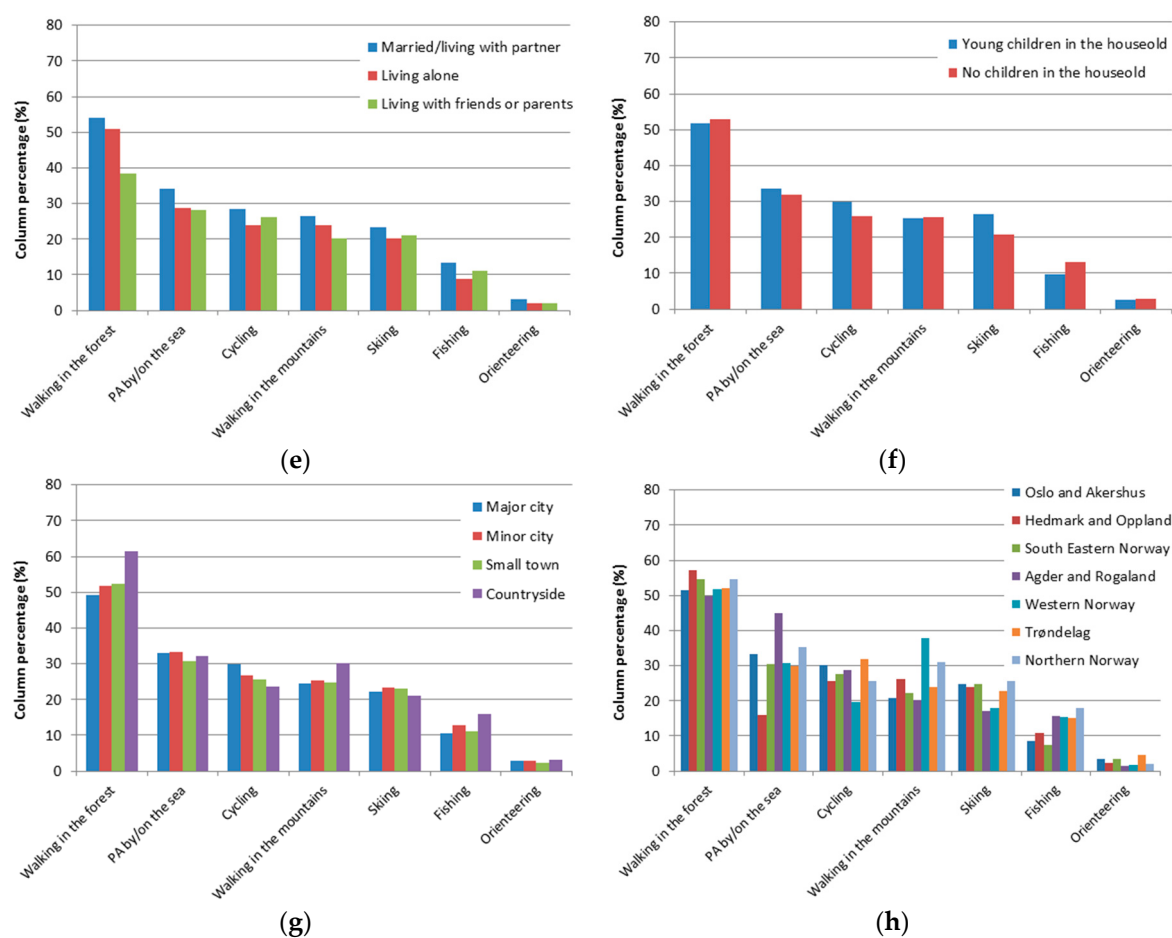

**Figure S2.** Prevalence of adult Norwegians engaging in different forms of green exercise “fairly often” by (*n* = 2168): (a) sex; (b) age group; (c) education level; (d) household income; (e) living situation; (f) having/not having young children in the household; (g) centrality; (h) region. The bars represent the prevalence of individual who reported to engage in the specific form of green exercise “fairly often”, whereas those who engaged in the activity “never/seldom” are not reported because it would be redundant.

**Table S1.** Weekly green exercise in relation with socio-demographic characteristics restricted to women (*n* = 1076).

| Population Sub-Group                         | Total<br>Sample (%) | Weekly Green Exercise      |                             |                           |
|----------------------------------------------|---------------------|----------------------------|-----------------------------|---------------------------|
|                                              |                     | No <sup>a</sup><br>(Row %) | Yes <sup>b</sup><br>(Row %) | Unadjusted<br>OR (95% CI) |
| Age                                          |                     |                            |                             |                           |
| Young adults (18–44 years)                   | 32.4                | 39.2                       | 28.4                        | -                         |
| Mid-age adults (4–64 years)                  | 49.0                | 49.6                       | 48.6                        | 1.35 (1.02–1.77) *        |
| Older adults (>65 years)                     | 18.6                | 11.2                       | 23.0                        | 2.82 (1.90–4.17) ***      |
| Education level                              |                     |                            |                             |                           |
| Below upper secondary education (≤10 years ) | 8.0                 | 7.0                        | 8.6                         | -                         |
| Upper secondary education (1–13 years)       | 29.7                | 31.4                       | 28.7                        | n.s.                      |
| Higher education (>13 years)                 | 48.3                | 46.6                       | 49.3                        | n.s.                      |
| Currently studying                           | 13.9                | 15.0                       | 13.3                        | n.s.                      |
| Household income (6 NOK ≈ 1 USD)             |                     |                            |                             |                           |
| <399,000                                     | 35.8                | 38.5                       | 34.2                        | -                         |
| 400,000–799,000                              | 30.6                | 31.0                       | 30.3                        | n.s.                      |
| >800,000                                     | 33.6                | 30.5                       | 35.5                        | n.s.                      |
| Missing                                      | 11.9                | -                          | -                           |                           |
| Living situation (living with...)            |                     |                            |                             |                           |
| Spouse or partner                            | 64.6                | 61.3                       | 66.5                        | -                         |

|                               |      |      |      |                    |
|-------------------------------|------|------|------|--------------------|
| Alone                         | 30.6 | 32.2 | 29.6 | n.s.               |
| Parents or friends            | 4.8  | 6.5  | 3.9  | 0.55 (0.3–0.96) *  |
| <b>Small children at home</b> |      |      |      |                    |
| Yes                           | 28.6 | 28.7 | 28.6 | -                  |
| No                            | 71.4 | 71.3 | 71.4 | n.s.               |
| <b>Centrality</b>             |      |      |      |                    |
| Large city                    | 35.4 | 36.7 | 34.7 | -                  |
| Small city                    | 25.7 | 24.7 | 26.2 | n.s.               |
| Small town/Village            | 23.2 | 24.9 | 22.2 | n.s.               |
| Countryside                   | 15.7 | 13.7 | 16.9 | n.s.               |
| <b>Region</b>                 |      |      |      |                    |
| Oslo and Akershus             | 30.0 | 34.7 | 27.3 | -                  |
| Hedmark and Oppland           | 7.4  | 8.7  | 6.7  | n.s.               |
| South Eastern Norway          | 14.2 | 14.7 | 13.9 | n.s.               |
| Agder and Rogaland            | 12.0 | 10.0 | 13.2 | 1.68 (1.0–2.59) *  |
| Western Norway                | 18.3 | 15.2 | 20.1 | 1.68 (1.1–2.45) ** |
| Trøndelag                     | 8.9  | 7.2  | 9.9  | 1.75 (1.0–2.84) *  |
| Northern Norway               | 9.1  | 9.5  | 8.9  | n.s.               |

<sup>a</sup> Reporting not to engage in green exercise (0 min/week); <sup>b</sup> Reporting to engage in green exercise for  $\geq 1$  min/week. Statistics refer to odd ratio (OR) and 95% confidence interval (CI) with respect with the first category. \*  $p < 0.05$ ; \*\*  $p < 0.01$ ; \*\*\*  $p < 0.001$ .

**Table S2.** Weekly green exercise in relation with socio-demographic characteristics restricted to older (age  $\geq 65$  years;  $n = 456$ ).

| Population Sub-Group                         | Total<br>Sample (%) | Weekly Green Exercise      |                             |                           |
|----------------------------------------------|---------------------|----------------------------|-----------------------------|---------------------------|
|                                              |                     | No <sup>a</sup><br>(Row %) | Yes <sup>b</sup><br>(Row %) | Unadjusted<br>OR (95% CI) |
| <b>Gender</b>                                |                     |                            |                             |                           |
| Male                                         | 56.1                | 57.1                       | 55.8                        | -                         |
| Female                                       | 43.9                | 42.9                       | 44.2                        | n.s.                      |
| <b>Education level</b>                       |                     |                            |                             |                           |
| Below upper secondary education (≤10 years ) | 17.5                | 20.0                       | 16.8                        | -                         |
| Upper secondary education (11–13 years)      | 20.4                | 19.0                       | 20.8                        | n.s.                      |
| Higher education (>13 years)                 | 42.8                | 39.0                       | 43.9                        | n.s.                      |
| Currently studying                           | 19.3                | 21.9                       | 18.5                        | n.s.                      |
| <b>Household income (6 NOK ≈ 1 USD)</b>      |                     |                            |                             |                           |
| <399,000                                     | 35.4                | 37.4                       | 34.8                        | -                         |
| 400,000–799,000                              | 44.5                | 45.1                       | 44.3                        | n.s.                      |
| >800,000                                     | 20.1                | 17.6                       | 20.9                        | n.s.                      |
| Missing                                      | 10.7                | -                          | -                           | -                         |
| <b>Living situation (living with...)</b>     |                     |                            |                             |                           |
| Spouse or partner                            | 75.9                | 77.1                       | 75.5                        | -                         |
| Alone                                        | 23.7                | 1.0                        | 24.2                        | n.s.                      |
| Parents or friends                           | 0.4                 | 21.9                       | 0.3                         | n.s.                      |
| <b>Small children at home</b>                |                     |                            |                             |                           |
| Yes                                          | 4.2                 | 2.9                        | 4.6                         | -                         |
| No                                           | 95.8                | 97.1                       | 95.4                        | n.s.                      |
| <b>Centrality</b>                            |                     |                            |                             |                           |
| Large city                                   | 31.8                | 40.0                       | 29.3                        | -                         |
| Small city                                   | 24.8                | 21.0                       | 25.9                        | n.s.                      |
| Small town/Village                           | 24.3                | 26.7                       | 23.6                        | n.s.                      |
| Countryside                                  | 19.1                | 12.4                       | 21.1                        | 2.32 (1.16–4.63) *        |
| <b>Region</b>                                |                     |                            |                             |                           |
| Oslo and Akershus                            | 30.0                | 31.4                       | 29.6                        | -                         |
| Hedmark and Oppland                          | 9.0                 | 8.6                        | 9.1                         | n.s.                      |
| South Eastern Norway                         | 14.5                | 16.2                       | 14.0                        | n.s.                      |
| Agder and Rogaland                           | 12.1                | 11.4                       | 12.3                        | n.s.                      |

|                 |      |      |      |      |
|-----------------|------|------|------|------|
| Western Norway  | 16.4 | 17.1 | 16.2 | n.s. |
| Trøndelag       | 9.0  | 6.7  | 9.7  | n.s. |
| Northern Norway | 9.0  | 8.6  | 9.1  | n.s. |

<sup>a</sup> Reporting not to engage in green exercise (0 min/week); <sup>b</sup> Reporting to engage in green exercise for  $\geq 1$  min/week. Statistics refer to odd ratio (OR) and 95% confidence interval (CI) with respect with the first category. \*  $p < 0.05$ .

**Table S3.** Perceived factors that promote green exercise <sup>a</sup>, across groups with different physical activity profile and sociodemographic characteristics restricted to women ( $n = 613$  <sup>a</sup>).

| Population Sub-Group ( $n$ )                               | Perceived Factors That Promote Green Exercise (M $\pm$ SD) |                 |                      |                       |                  |
|------------------------------------------------------------|------------------------------------------------------------|-----------------|----------------------|-----------------------|------------------|
|                                                            | Accessibility to Nature                                    | Social Support  | PA Supportive Places | Institutional Support | Time Flexibility |
| <b>Weekly green exercise</b>                               |                                                            |                 |                      |                       |                  |
| No (33%)                                                   | 2.14 $\pm$ 0.86                                            | 2.24 $\pm$ 0.70 | 2.31 $\pm$ 0.80      | 2.12 $\pm$ 0.70       | 3.06 $\pm$ 0.72  |
| Yes (67%)                                                  | 2.06 $\pm$ 0.85                                            | 2.25 $\pm$ 0.67 | 2.35 $\pm$ 0.75      | 2.16 $\pm$ 0.68       | 3.07 $\pm$ 0.71  |
| MANOVA: <i>n.s.</i>                                        |                                                            |                 |                      |                       |                  |
| ANOVA <sup>b</sup>                                         | -                                                          | -               | -                    | -                     | -                |
| <b>PA status</b>                                           |                                                            |                 |                      |                       |                  |
| LA (40%)                                                   | 2.13 $\pm$ 0.88                                            | 2.27 $\pm$ 0.69 | 2.26 $\pm$ 0.78      | 2.13 $\pm$ 0.68       | 3.10 $\pm$ 0.67  |
| RA (34%)                                                   | 2.07 $\pm$ 0.83                                            | 2.26 $\pm$ 0.65 | 2.35 $\pm$ 0.74      | 2.14 $\pm$ 0.69       | 3.07 $\pm$ 0.72  |
| HA (27%)                                                   | 2.04 $\pm$ 0.83                                            | 2.19 $\pm$ 0.69 | 2.44 $\pm$ 0.76      | 2.18 $\pm$ 0.70       | 3.01 $\pm$ 0.77  |
| MANOVA: $\lambda = 0.96$ ; $F_{(10, 1212)} = 2.56$ *       |                                                            |                 |                      |                       |                  |
| ANOVA: $F_{(1, 610)} = \dots$                              | <i>n.s.</i>                                                | <i>n.s.</i>     | 4.43 *               | <i>n.s.</i>           | <i>n.s.</i>      |
| <b>Age group</b>                                           |                                                            |                 |                      |                       |                  |
| Young adults, 18–44 years (30%)                            | 2.06 $\pm$ 0.82                                            | 2.33 $\pm$ 0.63 | 2.34 $\pm$ 0.76      | 1.98 $\pm$ 0.71       | 3.04 $\pm$ 0.76  |
| Mid-age adults, 45–64 years (52%)                          | 2.05 $\pm$ 0.83                                            | 2.24 $\pm$ 0.69 | 2.32 $\pm$ 0.76      | 2.19 $\pm$ 0.68       | 3.07 $\pm$ 0.68  |
| Older adults, >65 years (18%)                              | 2.22 $\pm$ 0.96                                            | 2.15 $\pm$ 0.70 | 2.38 $\pm$ 0.79      | 2.31 $\pm$ 0.61       | 3.10 $\pm$ 0.72  |
| MANOVA: $\lambda = 0.94$ ; $F_{(10, 1212)} = 3.65$ ***     |                                                            |                 |                      |                       |                  |
| ANOVA: $F_{(2, 610)} = \dots$                              | <i>n.s.</i>                                                | <i>n.s.</i>     | <i>n.s.</i>          | 7.36 **               | <i>n.s.</i>      |
| <b>Educational level</b>                                   |                                                            |                 |                      |                       |                  |
| Below upper secondary education (7%)                       | 2.42 $\pm$ 0.94                                            | 2.15 $\pm$ 0.70 | 2.30 $\pm$ 0.78      | 2.28 $\pm$ 0.79       | 3.13 $\pm$ 0.78  |
| Upper secondary education (28%)                            | 2.15 $\pm$ 0.94                                            | 2.24 $\pm$ 0.69 | 2.29 $\pm$ 0.77      | 2.19 $\pm$ 0.72       | 3.16 $\pm$ 0.71  |
| Higher education (51%)                                     | 2.04 $\pm$ 0.77                                            | 2.26 $\pm$ 0.65 | 2.33 $\pm$ 0.74      | 2.14 $\pm$ 0.65       | 3.03 $\pm$ 0.68  |
| Currently studying (14%)                                   | 1.97 $\pm$ 0.87                                            | 2.26 $\pm$ 0.72 | 2.48 $\pm$ 0.82      | 2.02 $\pm$ 0.69       | 2.97 $\pm$ 0.77  |
| MANOVA: $\lambda = 0.93$ ; $F_{(15, 1671)} = 2.91$ ***     |                                                            |                 |                      |                       |                  |
| ANOVA: $F_{(3, 609)} = \dots$                              | 3.43 *                                                     | <i>n.s.</i>     | <i>n.s.</i>          | <i>n.s.</i>           | <i>n.s.</i>      |
| <b>Household income, 6 NOK <math>\approx</math> 1 US\$</b> |                                                            |                 |                      |                       |                  |
| <b>(<math>n = 554</math> <sup>c</sup>)</b>                 |                                                            |                 |                      |                       |                  |
| <399,000 (33%)                                             | 2.19 $\pm$ 0.84                                            | 2.28 $\pm$ 0.70 | 2.39 $\pm$ 0.74      | 2.16 $\pm$ 0.71       | 3.06 $\pm$ 0.77  |
| 400,000–799,000 (32%)                                      | 2.07 $\pm$ 0.86                                            | 2.25 $\pm$ 0.70 | 2.34 $\pm$ 0.75      | 2.18 $\pm$ 0.65       | 3.04 $\pm$ 0.71  |
| >800,000 (35%)                                             | 1.93 $\pm$ 0.79                                            | 2.19 $\pm$ 0.62 | 2.32 $\pm$ 0.79      | 2.07 $\pm$ 0.67       | 3.03 $\pm$ 0.68  |
| MANOVA: <i>n.s.</i>                                        |                                                            |                 |                      |                       |                  |
| ANOVA <sup>b</sup>                                         | -                                                          | -               | -                    | -                     | -                |
| <b>Living situation</b>                                    |                                                            |                 |                      |                       |                  |
| Spouse or partner (66%)                                    | 2.07 $\pm$ 0.86                                            | 2.22 $\pm$ 0.67 | 2.34 $\pm$ 0.77      | 2.17 $\pm$ 0.68       | 3.05 $\pm$ 0.68  |
| Alone (30%)                                                | 2.12 $\pm$ 0.83                                            | 2.29 $\pm$ 0.69 | 2.34 $\pm$ 0.75      | 2.13 $\pm$ 0.70       | 3.13 $\pm$ 0.72  |
| Parents or friends (4%)                                    | 2.06 $\pm$ 0.84                                            | 2.48 $\pm$ 0.68 | 2.29 $\pm$ 0.72      | 1.95 $\pm$ 0.71       | 2.89 $\pm$ 1.03  |
| MANOVA: <i>n.s.</i>                                        |                                                            |                 |                      |                       |                  |
| ANOVA <sup>b</sup>                                         | -                                                          | -               | -                    | -                     | -                |
| <b>Small children at home</b>                              |                                                            |                 |                      |                       |                  |
| Yes (29%)                                                  | 1.98 $\pm$ 0.79                                            | 2.23 $\pm$ 0.65 | 2.30 $\pm$ 0.74      | 2.09 $\pm$ 0.67       | 3.02 $\pm$ 0.69  |
| No (71%)                                                   | 2.13 $\pm$ 0.87                                            | 2.26 $\pm$ 0.69 | 2.35 $\pm$ 0.77      | 2.17 $\pm$ 0.70       | 3.08 $\pm$ 0.72  |
| MANOVA: <i>n.s.</i>                                        |                                                            |                 |                      |                       |                  |
| ANOVA <sup>b</sup>                                         | -                                                          | -               | -                    | -                     | -                |
| <b>Centrality</b>                                          |                                                            |                 |                      |                       |                  |
| Large city (35%)                                           | 2.07 $\pm$ 0.85                                            | 2.24 $\pm$ 0.68 | 2.29 $\pm$ 0.73      | 2.1 $\pm$ 0.69        | 3.11 $\pm$ 0.65  |
| Small city (27%)                                           | 2.15 $\pm$ 0.84                                            | 2.31 $\pm$ 0.68 | 2.47 $\pm$ 0.79      | 2.17 $\pm$ 0.70       | 3.08 $\pm$ 0.74  |
| Small town/village (23%)                                   | 2.08 $\pm$ 0.87                                            | 2.25 $\pm$ 0.68 | 2.30 $\pm$ 0.79      | 2.20 $\pm$ 0.68       | 2.99 $\pm$ 0.72  |
| Country-side (16%)                                         | 2.00 $\pm$ 0.84                                            | 2.15 $\pm$ 0.64 | 2.27 $\pm$ 0.74      | 2.14 $\pm$ 0.69       | 3.05 $\pm$ 0.79  |
| MANOVA: <i>n.s.</i>                                        |                                                            |                 |                      |                       |                  |
| ANOVA <sup>b</sup>                                         | -                                                          | -               | -                    | -                     | -                |
| <b>Region (1256)</b>                                       |                                                            |                 |                      |                       |                  |
| Oslo and Akershus (27%)                                    | 2.05 $\pm$ 0.85                                            | 2.17 $\pm$ 0.67 | 2.27 $\pm$ 0.77      | 2.09 $\pm$ 0.65       | 3.01 $\pm$ 0.71  |

|                            |             |             |             |             |             |
|----------------------------|-------------|-------------|-------------|-------------|-------------|
| Hedmark and Oppland (8%)   | 2.04 ± 0.97 | 2.07 ± 0.66 | 2.21 ± 0.91 | 2.05 ± 0.74 | 2.98 ± 0.77 |
| South Eastern Norway (15%) | 2.01 ± 0.77 | 2.28 ± 0.66 | 2.37 ± 0.75 | 2.11 ± 0.68 | 3.14 ± 0.65 |
| Agder and Rogaland (14%)   | 2.21 ± 0.9  | 2.43 ± 0.68 | 2.46 ± 0.78 | 2.30 ± 0.69 | 3.11 ± 0.76 |
| Western Norway (18%)       | 2.12 ± 0.88 | 2.25 ± 0.66 | 2.34 ± 0.78 | 2.17 ± 0.71 | 3.09 ± 0.64 |
| Trøndelag (9%)             | 1.9 ± 0.76  | 2.20 ± 0.67 | 2.20 ± 0.68 | 2.07 ± 0.62 | 3.07 ± 0.79 |
| Northern Norway (10)       | 2.25 ± 0.79 | 2.34 ± 0.72 | 2.52 ± 0.63 | 2.26 ± 0.74 | 3.08 ± 0.76 |
| MANOVA: <i>n.s.</i>        |             |             |             |             |             |
| ANOVA <sup>b</sup>         | -           | -           | -           | -           | -           |

<sup>a</sup> The analyses are performed on a sub-sample of respondents, i.e., all women who reported future intent for green exercise; <sup>b</sup> ANOVA was not performed because significance was not achieved in the multivariate test; <sup>c</sup> The smaller sample size is result of excluding respondents who answered that they “don’t know” what is their household income or “don’t want to answer”. PA status: LA = Low PA levels (<150 min/week); RA = Recommended PA levels (150–299 min/week); HA = High PA levels (≥300 min/week). \*  $p < 0.05$ ; \*\*  $p < 0.01$ ; \*\*\*  $p < 0.001$

**Table S4.** Perceived factors that promote green exercise <sup>a</sup>, across groups with different physical activity profile and sociodemographic characteristics restricted to older adult (age ≥ 65 years;  $n = 263$  <sup>a</sup>).

| Population Sub-Group                                | Perceived Factors That Promote Green Exercise (M ± SD) |                |                      |                       |                  |
|-----------------------------------------------------|--------------------------------------------------------|----------------|----------------------|-----------------------|------------------|
|                                                     | Accessibility to Nature                                | Social Support | PA Supportive Places | Institutional Support | Time Flexibility |
| <b>Weekly green exercise</b>                        |                                                        |                |                      |                       |                  |
| No (19%)                                            | 2.23 ± 0.98                                            | 1.92 ± 0.74    | 2.36 ± 0.73          | 2.35 ± 0.70           | 3.02 ± 0.84      |
| Yes (81%)                                           | 2.11 ± 0.87                                            | 2.08 ± 0.66    | 2.33 ± 0.78          | 2.27 ± 0.66           | 2.94 ± 0.75      |
| MANOVA: <i>n.s.</i>                                 |                                                        |                |                      |                       |                  |
| ANOVA <sup>b</sup>                                  | -                                                      | -              | -                    | -                     | -                |
| <b>PA status</b>                                    |                                                        |                |                      |                       |                  |
| LA (38%)                                            | 2.16 ± 0.90                                            | 1.99 ± 0.72    | 2.39 ± 0.79          | 2.28 ± 0.67           | 2.96 ± 0.77      |
| RA (32%)                                            | 2.11 ± 0.91                                            | 2.11 ± 0.66    | 2.25 ± 0.76          | 2.23 ± 0.65           | 2.95 ± 0.72      |
| HA (31%)                                            | 2.12 ± 0.86                                            | 2.05 ± 0.65    | 2.35 ± 0.76          | 2.33 ± 0.69           | 2.95 ± 0.82      |
| MANOVA: <i>n.s.</i>                                 |                                                        |                |                      |                       |                  |
| ANOVA <sup>b</sup>                                  | -                                                      | -              | -                    | -                     | -                |
| <b>Sex</b>                                          |                                                        |                |                      |                       |                  |
| Male (58%)                                          | 2.07 ± 0.83                                            | 1.98 ± 0.65    | 2.30 ± 0.76          | 2.26 ± 0.71           | 2.85 ± 0.78      |
| Female (42%)                                        | 2.22 ± 0.96                                            | 2.15 ± 0.70    | 2.38 ± 0.79          | 2.31 ± 0.61           | 3.10 ± 0.72      |
| MANOVA: $\lambda = 0.95$ ; $F_{(5, 257)} = 2.74$ *  |                                                        |                |                      |                       |                  |
| ANOVA: $F_{(1, 261)} = \dots$                       | <i>n.s.</i>                                            | 4.41 *         | <i>n.s.</i>          | <i>n.s.</i>           | 9.64 **          |
| <b>Educational level</b>                            |                                                        |                |                      |                       |                  |
| Below upper secondary education (18%)               | 2.51 ± 0.88                                            | 2.16 ± 0.63    | 2.46 ± 0.66          | 2.57 ± 0.69           | 3.06 ± 0.73      |
| Upper secondary education (21%)                     | 2.19 ± 0.89                                            | 2.06 ± 0.70    | 2.40 ± 0.80          | 2.28 ± 0.64           | 3.07 ± 0.80      |
| Higher education (42%)                              | 2.01 ± 0.84                                            | 2.03 ± 0.67    | 2.23 ± 0.77          | 2.19 ± 0.62           | 2.85 ± 0.77      |
| Currently studying (19%)                            | 1.98 ± 0.90                                            | 1.98 ± 0.71    | 2.36 ± 0.81          | 2.21 ± 0.74           | 2.96 ± 0.74      |
| MANOVA: $\lambda = 0.90$ ; $F_{(15, 704)} = 1.78$ * |                                                        |                |                      |                       |                  |
| ANOVA: $F_{(3, 259)} = \dots$                       | 3.88 **                                                | <i>n.s.</i>    | <i>n.s.</i>          | 3.82 **               | <i>n.s.</i>      |
| <b>Household income, 6 NOK ≈ 1 US\$)</b>            |                                                        |                |                      |                       |                  |
| <b>(<math>n = 239</math> <sup>c</sup>)</b>          |                                                        |                |                      |                       |                  |
| <399,000 (34%)                                      | 2.33 ± 0.90                                            | 2.09 ± 0.74    | 2.48 ± 0.77          | 2.37 ± 0.68           | 2.91 ± 0.82      |
| 400,000–799,000 (45%)                               | 2.05 ± 0.84                                            | 2.01 ± 0.64    | 2.23 ± 0.75          | 2.26 ± 0.61           | 2.95 ± 0.71      |
| >800,000 (21%)                                      | 1.84 ± 0.84                                            | 2.03 ± 0.68    | 2.20 ± 0.74          | 2.07 ± 0.64           | 2.95 ± 0.83      |
| MANOVA: <i>n.s.</i>                                 |                                                        |                |                      |                       |                  |
| ANOVA <sup>b</sup>                                  | -                                                      | -              | -                    | -                     | -                |
| <b>Living situation</b>                             |                                                        |                |                      |                       |                  |
| Spouse or partner (79%)                             | 2.07 ± 0.89                                            | 2.01 ± 0.66    | 2.31 ± 0.77          | 2.27 ± 0.67           | 2.93 ± 0.76      |
| Alone (21%)                                         | 2.37 ± 0.84                                            | 2.20 ± 0.74    | 2.42 ± 0.74          | 2.34 ± 0.68           | 3.05 ± 0.77      |
| Parents or friends (0%)                             | -                                                      | -              | -                    | -                     | -                |
| MANOVA: <i>n.s.</i>                                 |                                                        |                |                      |                       |                  |
| ANOVA <sup>b</sup>                                  | -                                                      | -              | -                    | -                     | -                |
| <b>Small children at home</b>                       |                                                        |                |                      |                       |                  |
| Yes (3%)                                            | 1.97 ± 0.59                                            | 1.87 ± 0.63    | 2.17 ± 0.68          | 2.20 ± 0.54           | 2.90 ± 1.10      |
| No (97%)                                            | 2.14 ± 0.90                                            | 2.06 ± 0.68    | 2.34 ± 0.77          | 2.28 ± 0.67           | 2.96 ± 0.75      |
| MANOVA: <i>n.s.</i>                                 |                                                        |                |                      |                       |                  |
| ANOVA <sup>b</sup>                                  | -                                                      | -              | -                    | -                     | -                |
| <b>Centrality</b>                                   |                                                        |                |                      |                       |                  |
| Large city (34%)                                    | 2.12 ± 0.92                                            | 2.02 ± 0.69    | 2.29 ± 0.78          | 2.29 ± 0.70           | 3.02 ± 0.78      |

|                            |             |             |             |             |             |
|----------------------------|-------------|-------------|-------------|-------------|-------------|
| Small city (22%)           | 2.17 ± 0.90 | 2.03 ± 0.68 | 2.48 ± 0.80 | 2.30 ± 0.74 | 2.90 ± 0.78 |
| Small town/village (25%)   | 2.24 ± 0.93 | 2.07 ± 0.73 | 2.37 ± 0.76 | 2.25 ± 0.67 | 2.90 ± 0.76 |
| Country-side (19%)         | 1.98 ± 0.76 | 2.10 ± 0.61 | 2.18 ± 0.70 | 2.28 ± 0.55 | 2.96 ± 0.74 |
| MANOVA: <i>n.s.</i>        |             |             |             |             |             |
| ANOVA <sup>b</sup>         | -           | -           | -           | -           | -           |
| <b>Region</b>              |             |             |             |             |             |
| Oslo and Akershus (30%)    | 2.14 ± 0.86 | 2.07 ± 0.73 | 2.27 ± 0.77 | 2.28 ± 0.67 | 3.02 ± 0.73 |
| Hedmark and Oppland (9%)   | 2.06 ± 0.70 | 1.88 ± 0.59 | 2.47 ± 0.80 | 2.35 ± 0.66 | 2.85 ± 0.72 |
| South Eastern Norway (18%) | 2.12 ± 0.84 | 2.11 ± 0.73 | 2.39 ± 0.79 | 2.19 ± 0.75 | 3.08 ± 0.84 |
| Agder and Rogaland (10%)   | 2.24 ± 0.99 | 2.13 ± 0.74 | 2.33 ± 0.77 | 2.20 ± 0.71 | 2.68 ± 0.98 |
| Western Norway (17%)       | 2.14 ± 1.02 | 2.04 ± 0.63 | 2.26 ± 0.80 | 2.29 ± 0.68 | 2.98 ± 0.68 |
| Trøndelag (10%)            | 2.00 ± 0.88 | 1.94 ± 0.53 | 2.34 ± 0.81 | 2.34 ± 0.61 | 2.93 ± 0.78 |
| Northern Norway (10%)      | 2.19 ± 0.94 | 2.09 ± 0.70 | 2.42 ± 0.66 | 2.34 ± 0.61 | 2.93 ± 0.68 |
| MANOVA: <i>n.s.</i>        |             |             |             |             |             |
| ANOVA <sup>b</sup>         | -           | -           | -           | -           | -           |

<sup>a</sup> The analyses are performed on a sub-sample of respondents, i.e., all those who reported future intent for green exercise; <sup>b</sup> ANOVA was not performed because significance was not achieved in the multivariate test; <sup>c</sup> The smaller sample size is result of excluding respondents who answered that they “don’t know” what is their household income or “don’t want to answer”. PA status: LA = Low PA levels (<150 min/week); RA = Recommended PA levels (150–299 min/week); HA = High PA levels (≥300 min/week). \*  $p < 0.05$ ; \*\*  $p < 0.01$ .

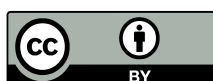

© 2016 by the authors. Submitted for possible open access publication under the terms and conditions of the Creative Commons Attribution (CC-BY) license (<http://creativecommons.org/licenses/by/4.0/>).
